# Supplementary material
Source: Royal Society of Chemistry journal article supplement (doi:10.1039/d6ay00451b)

1

## Supporting information

2

3

### Nanobody-Based Enzyme Immunoassay for

4

### Naringenin in Pummelos and Herbal Samples

5 Feng Sun <sup>a, b, c, 1</sup>, Chunlei Cao <sup>a, b, c, 1</sup>, Jing Zhao <sup>d, 1</sup>, Qiyang Zhao <sup>a, b, c</sup>, Yue He <sup>a, b, c</sup>, Jing

6 Li <sup>a, b, c</sup>, Yaohai Zhang <sup>a, b, c</sup>, Yongliang Cui <sup>a, b, c, \*</sup>

7 <sup>a</sup> *Key Laboratory of Quality and Safety Control of Citrus Fruits, Ministry of Agriculture*

8 *and Rural Affairs, Southwest University, Chongqing, 400712, China*

9 <sup>b</sup> *National Citrus Engineering Research Center, Chongqing 400712, PR China*

10 <sup>c</sup> *Laboratory of Quality & Safety Risk Assessment for Citrus Products (Chongqing),*

11 *Ministry of Agriculture, Citrus Research Institute, Southwest University, Chongqing*

12 *400712, China*

13 <sup>d</sup> *Institute of Quality Standard and Testing Technology for Agro-Products, Chinese*

14 *Academy of Agricultural Sciences, Beijing 100081, China*

15 Corresponding Author \*

16 E-mail: [cuiyongliang123@163.com](mailto:cuiyongliang123@163.com)

17 <sup>1</sup> These authors contributed equally to the work and can be considered co-first authors.

18

19 **Buffers:**

- 20 (1) The phosphate-buffered saline (PBS, 10X, 0.1M) was supplied by Sangon Biotech  
21 Co., Ltd (Shanghai, China).
- 22 (2) Coating buffer (CBS): 0.05 M sodium carbonate buffer with pH of 9.6.
- 23 (3) Blocking buffer: 0.01 M PBS containing 3% non-fat powdered milk.
- 24 (4) Washing buffer (PBST): 0.01 M PBS containing 0.1% Tween-20.
- 25 (5) Sample dilution buffer (PBSTG): 0.01 M PBS containing 0.1% Tween-20 and 0.5%  
26 gelatin.
- 27 (6) Citrate buffer: 23.02 g of potassium dihydrogen citrate and 0.05 g of potassium  
28 sorbate, dissolved in deionized water and set to 500 mL.
- 29 (7) TMB substrate solution: 11 mL of citrate buffer, 101  $\mu$ L of 1% H<sub>2</sub>O<sub>2</sub> and 200  $\mu$ L  
30 of 0.6% TMB in DMSO.
- 31 (8) Stop buffer: 2.0 M H<sub>2</sub>SO<sub>4</sub>.

32 **Table S1. Sequences of the primers.**

| <b>Primers</b> | <b>Sequences</b>                                         |
|----------------|----------------------------------------------------------|
| Alp-Vh-F1      | CATGCCATGACTGTGGCCCAGGCGGCCAGKTGCAGCT<br>CGTGGAGTC       |
| AlpVhh-R1      | CATGCCATGACTCGCGGCCGGCCTGGCCATGGGGGTCTT<br>CGCTGTGGTGCG  |
| AlpVhh-R2      | CATGCCATGACTCGCGGCCGGCCTGGCCGTCTTGTGGTT<br>TTGGTGTCTTGGG |
| Pseq           | TTCCGGCTCGTATGTTGTGTG                                    |

**Table S2. Cross-reactivity of the antibodies against Naringenin structural analogs.**

| Flavonoid  | Structure                                                                           | C9                       |        | C13                      |        |
|------------|-------------------------------------------------------------------------------------|--------------------------|--------|--------------------------|--------|
|            |                                                                                     | IC <sub>50</sub> (ng/ml) | CR(%)  | IC <sub>50</sub> (ng/ml) | CR(%)  |
| Naringenin | 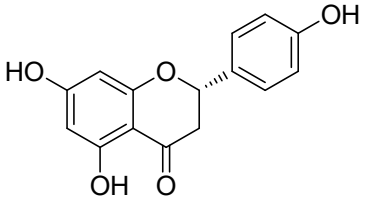  | 15.31                    | 100.00 | 19.60                    | 100.00 |
| Hesperitin |   | 4103.00                  | 0.37   | 3970.00                  | 0.49   |
| Poncirin   |  | -                        | <0.1   | -                        | <0.1   |

---

Naringin

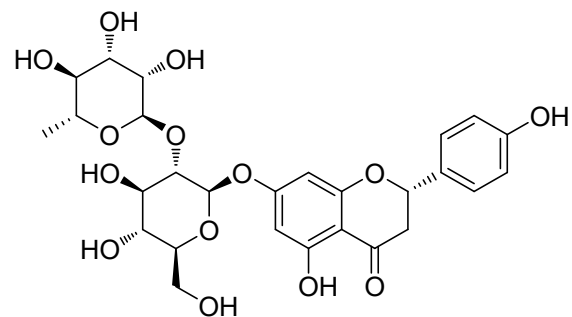

-

<0.1

-

<0.1

Nobiletin

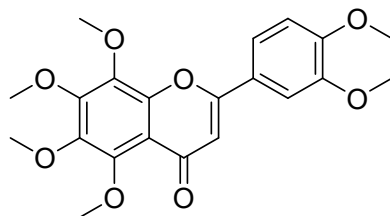

-

<0.1

-

<0.1

Sinensetin

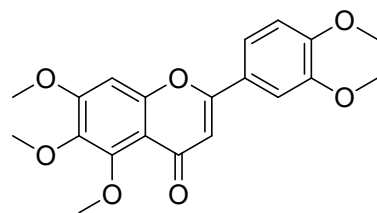

-

<0.1

-

<0.1

Tangeretin

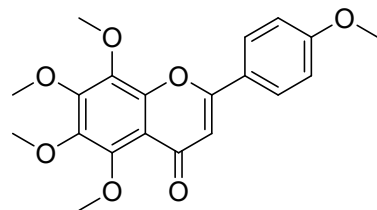

-

<0.1

-

<0.1

---

---

Rutin

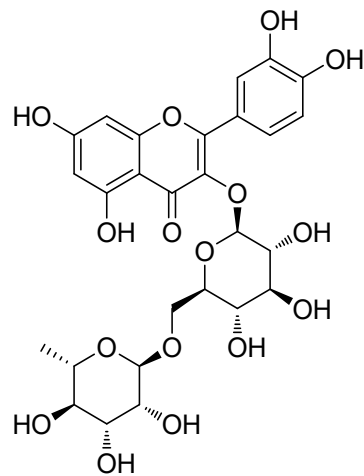

-

<0.1

-

<0.1

Hesperidin

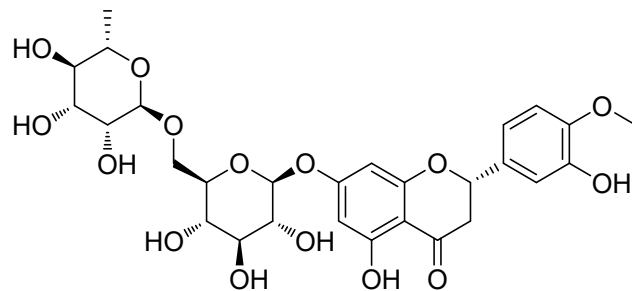

-

<0.1

-

<0.1

---

---

Narirutin

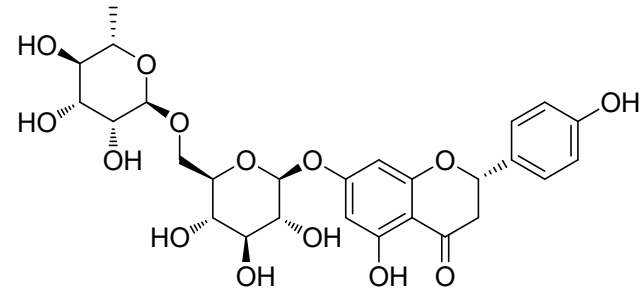

-

<0.1

-

<0.1

Rhoifolin

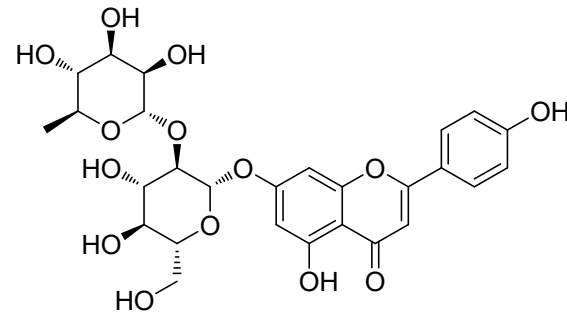

-

<0.1

-

<0.1

Neohesperidin

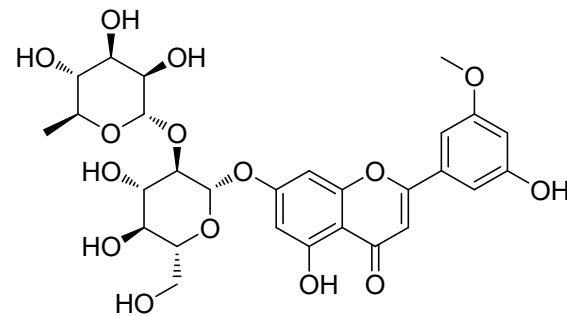

-

<0.1

-

<0.1

---

---

Eriocitrin

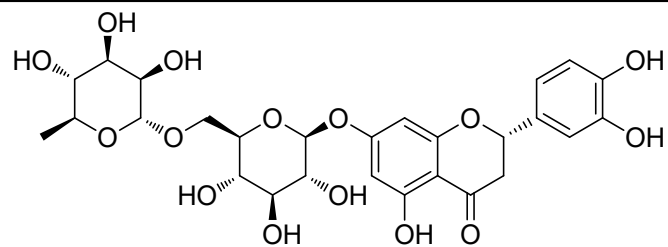

-

<0.1

-

<0.1

---

**Table S3. Comparison of analytical performance and characteristics of the developed Nb-ELISA with other reported methods for naringenin detection.**

| Method                                        | Key analytical figures                                                                                                                 | Pros                                                                                                                                                                | Cons                                                                                                               | Reference  |
|-----------------------------------------------|----------------------------------------------------------------------------------------------------------------------------------------|---------------------------------------------------------------------------------------------------------------------------------------------------------------------|--------------------------------------------------------------------------------------------------------------------|------------|
| Nb-ELISA                                      | IC <sub>50</sub> = 15.31 ng/mL;<br>Linear range: 4.55–60.60 ng/mL                                                                      | High thermal stability; nanobody-based recognition; simple operation; cost-effective; suitable for high-throughput screening; no need for expensive instrumentation | Moderate sensitivity compared to instrumental methods; requires specific nanobody production                       | this study |
| icELISA<br>(conventional monoclonal antibody) | IC <sub>50</sub> = 4.43 ng/mL;<br>Linear range: 1.15–15.81 ng/mL                                                                       | Reliable and accurate; established immunoassay format                                                                                                               | Lower thermal stability than nanobodies; narrower linear range; antibody production more complex                   | [26]       |
| GC-FID / GC-MS                                | LOD: 1.13–2.72 µg/g (in leaves); RSD: 1.65–1.81%                                                                                       | Rapid; good repeatability; suitable for volatile compounds                                                                                                          | Requires derivatization; high instrument cost; not ideal for non-volatile naringenin; sample preparation intensive | [27]       |
| Chromatographic method<br>(HPLC/UPLC)         | RSD < 0.9%; Accuracy > 98%                                                                                                             | Fast; sensitive; gold standard for quantification                                                                                                                   | High instrument and maintenance cost; time-consuming for large sample sets; requires skilled personnel             | [28]       |
| Electrochemical sensor                        | Linear range: 1.0×10 <sup>-13</sup> –1.0×10 <sup>-12</sup> mol/L; LOD: 2.84×10 <sup>-14</sup> mol/L; LOQ: 9.47×10 <sup>-14</sup> mol/L | Cost-effective; high efficiency; extremely low LOD; suitable for standard solutions                                                                                 | Limited to standard solutions; matrix effects in real samples; poor stability in complex biological/plant matrices | [30]       |

|                     |                                                                                               |                                                                  |                                                                                                             |      |
|---------------------|-----------------------------------------------------------------------------------------------|------------------------------------------------------------------|-------------------------------------------------------------------------------------------------------------|------|
| Fluorescence method | Linear range: 0–200<br>μmol/L; LOD: 0.33–0.83<br>μmol/L                                       | Simple; rapid; high efficiency                                   | Relatively low sensitivity;<br>interference from<br>autofluorescence in plant extracts                      | [31] |
| MEKC                | Linear range: 0.1–50<br>μg/mL; LOD: 0.05<br>μg/mL; LOQ: 0.19<br>μg/mL; R <sup>2</sup> = 0.995 | Good resolution; low sample<br>consumption; moderate sensitivity | Requires capillary<br>electrophoresis system; not high-<br>throughput; method development<br>can be complex | [29] |

**Fig S1. Thermostability of naringenin-specific nanobodies Nb-C9 (■), Nb-C13 (●) and mAb-2A3D7 (▲). (A) Nanobodies and conventional monoclonal antibody were diluted to working concentrations in PBS and were incubated at 85 °C for various times, 0, 5, 15, 25, 35, 45 and 60 min; (B) Nanobodies and conventional monoclonal antibody were diluted to working concentrations in PBSTG and were heated at various temperatures, 20, 50, 65, 75 and 95 °C for 5 min.**

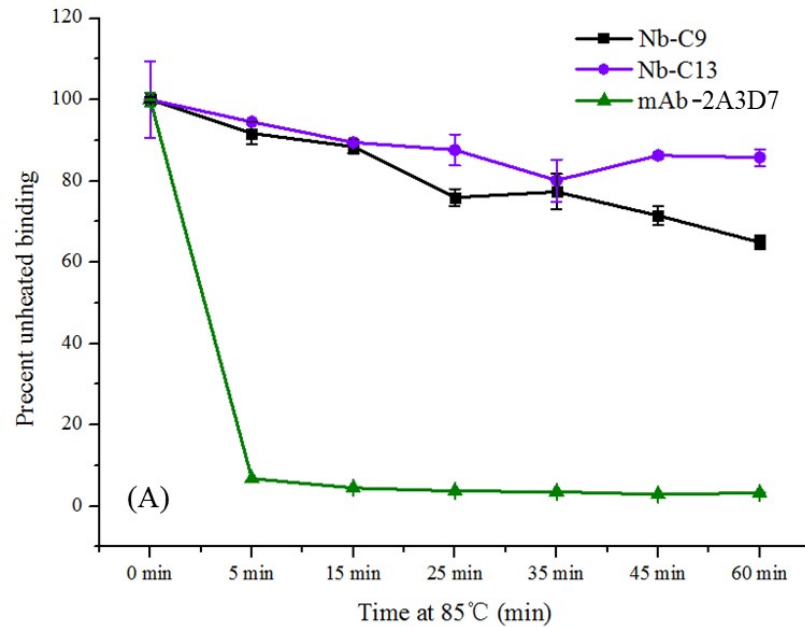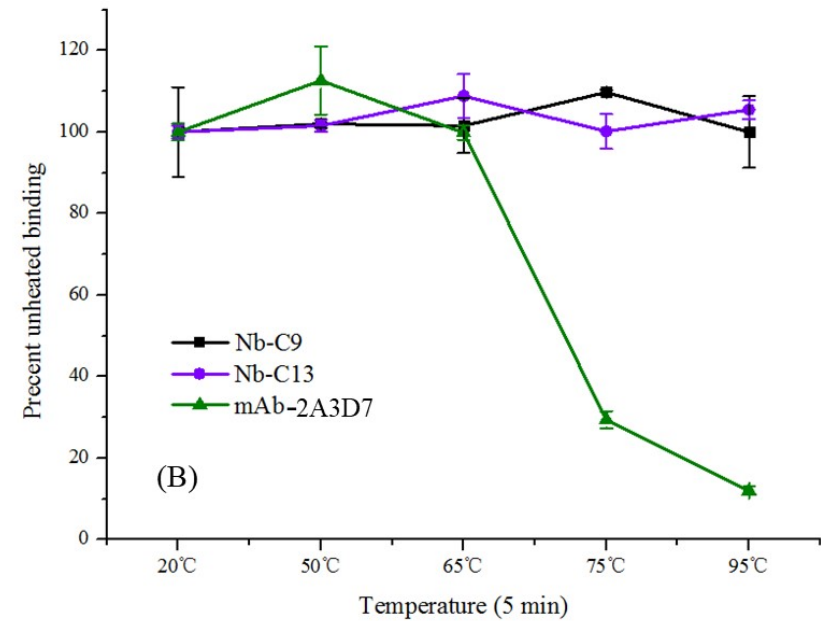

Supplement: d6ay00451b1.pdf [file d6ay00451b1.pdf]
